# Supplementary material for: Reduced graphene oxide supported ZnO quantum dots for visible light-induced simultaneous removal of tetracycline and hexavalent chromium
Source: Royal Society of Chemistry journal article supplement (doi:10.1039/d0ra02062a), 2020-01-01
Supplement: d0ra02062a1.pdf [file d0ra02062a1.pdf]

## Reduced Graphene Oxide Supported ZnO Quantum Dots for visible Light Induced Simultaneous Removal of Tetracycline and Cr(VI)

K.V. Ashok Kumar<sup>a</sup>, Bhairi Lakshminarayana<sup>a</sup>, D. Suryakala<sup>b</sup> Ch. Subrahmanyam<sup>a</sup>, \*

<sup>a</sup> Department of Chemistry, Indian Institute of Technology, Hyderabad, Kandi-502285,  
Telangana (India)

<sup>b</sup> Department of Chemistry, GITAM University, Visakhapatnam-530045, Andhra Pradesh (India)

Corresponding author: Phone: +91-40-23016050; Fax: +91-40-2301 6032; E-mail:

[csubbu@iith.ac.in](mailto:csubbu@iith.ac.in)

### Supporting Information:

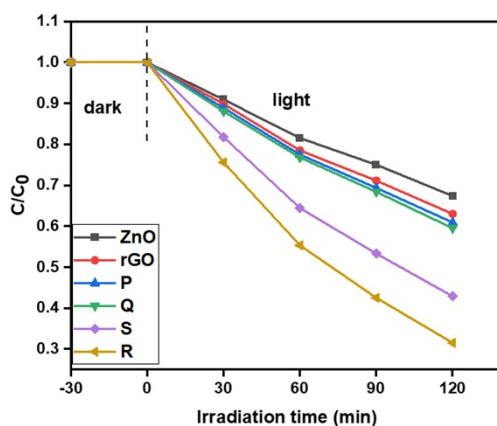

**Fig. S1:** Degradation profiles of tetracycline in aqueous solution. ZnO percentage vary from 0.5% to 2%, Irradiation Time=120 min, catalyst amount=50mg/L, Tetracycline concentration=20 ppm.

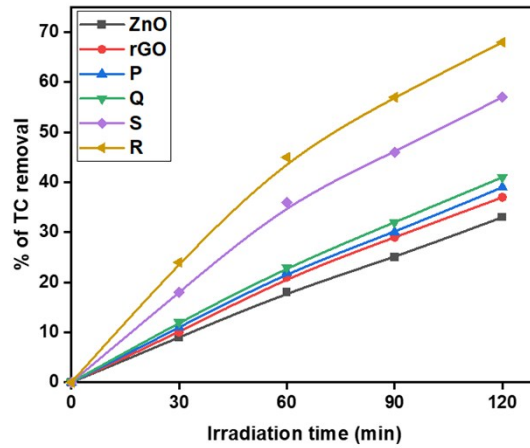

**Fig. S2:** Degradation percentages of tetracycline in aqueous solution. ZnO percentage vary from 0.5% to 2%, Irradiation Time=120 min, catalyst amount=50mg/L, Tetracycline concentration=20 ppm.

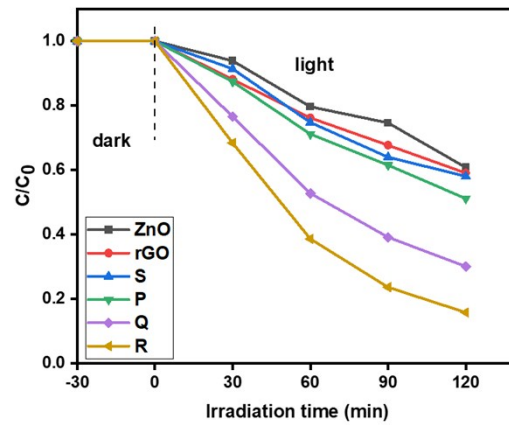

**Fig. S3:** The degradation profiles of Cr(VI) in aqueous solution. ZnO percentage vary from 0.5% to 2%, Irradiation Time=120 min, catalyst amount=50 mg/L, Cr(VI) concentration=20 ppm.

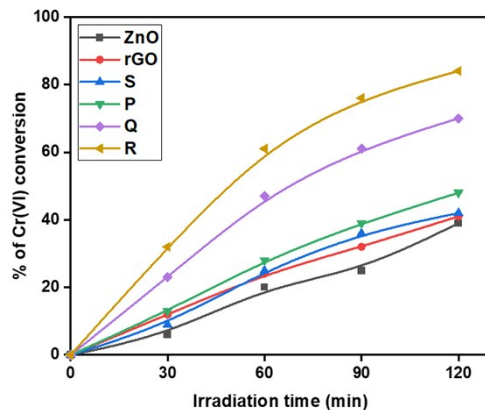

**Fig. S4:** Degradation percentages of Cr(VI) in aqueous solution. ZnO percentage vary from 0.5% to 2%, Irradiation Time=120 min, catalyst amount=50mg/L, Cr(VI) concentration=20 ppm.

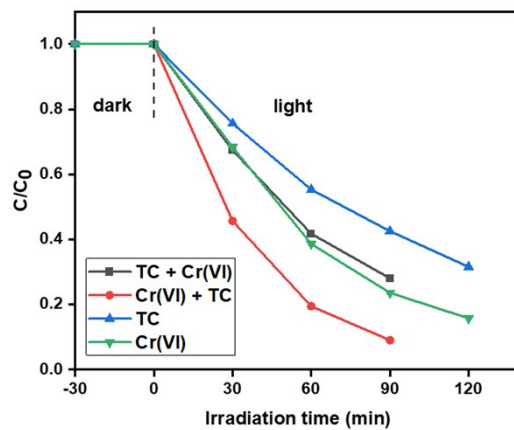

**Fig. S5:** The degradation profiles of simultaneous removal of tetracycline and Cr(VI) Irradiation time = 120 min, catalyst amount **R** = 50 mg/L.

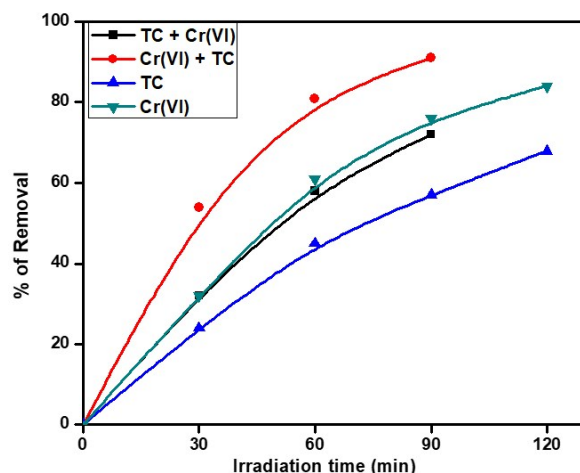

**Fig. S6:** The degradation percentages of simultaneous removal of tetracycline and Cr(VI) Irradiation time = 120 min, catalyst amount  $R = 50$  mg/L.

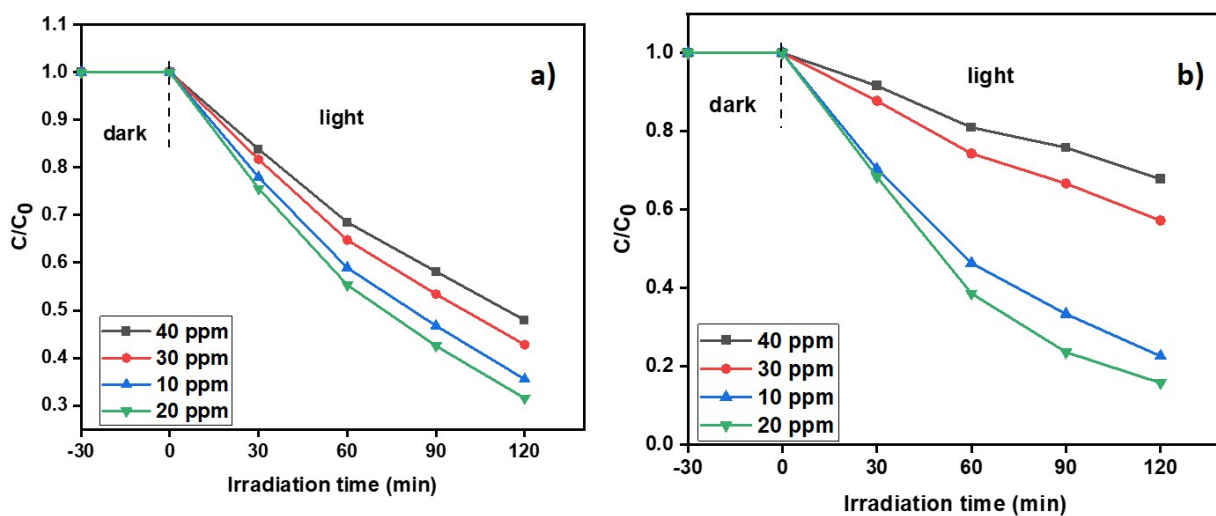

**Fig. S7:** The degradation profiles of various (a) tetracycline and (b) Cr(VI) concentration. Irradiation time = 120 min, catalyst amount  $R = 50$  mg/L.

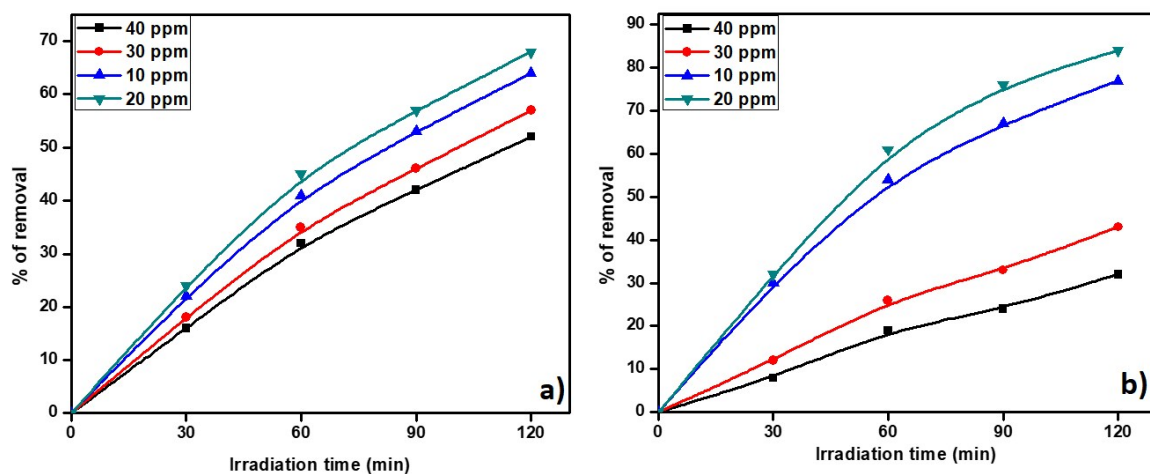

**Fig. S8:** The degradation percentages of various (a) tetracycline and (b) Cr(VI) concentration. Irradiation time = 120 min, catalyst amount  $R = 50$  mg/L.

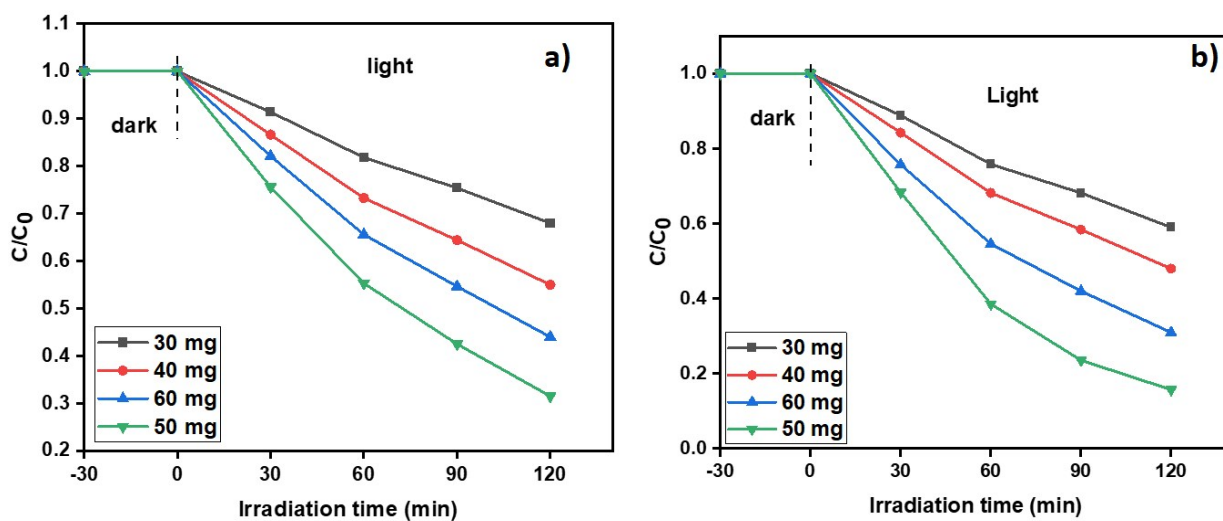

**Fig. S9:** The degradation profiles of different amounts of catalysts. Irradiation time = 120 min, Tetracycline concentration = 20 ppm, Cr(VI) concentration = 20 ppm

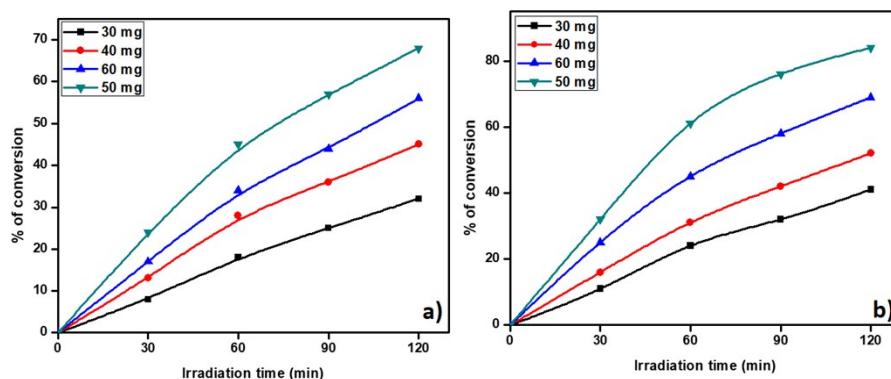

**Fig. S10:** The degradation percentages of different amounts of catalysts. Irradiation time = 120 min, Tetracycline concentration = 20 ppm, Cr(VI) concentration = 20 ppm

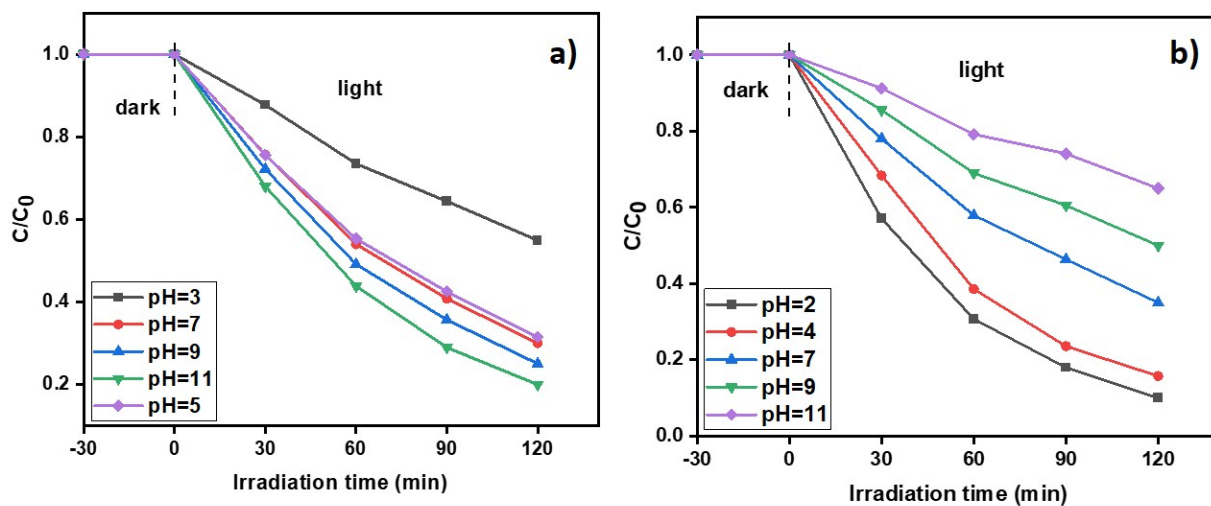

**Fig. S11:** The degradation profiles of various pH values. Irradiation time = 120 min, catalyst amount R = 50 mg/L, Tetracycline concentration = 20 ppm, Cr(VI) concentration = 20 ppm.

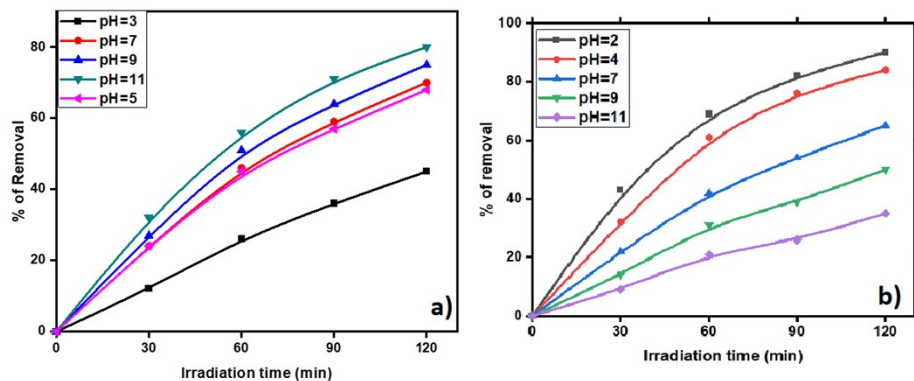

**Fig. S12:** The degradation percentages of various pH values. Irradiation time =120 min, catalyst amount R = 50 mg/L, Tetracycline concentration = 20 ppm, Cr(VI) concentration = 20 ppm.
